# Supplementary material
Source: PubMed Central journal article supplement (PMC5332567)

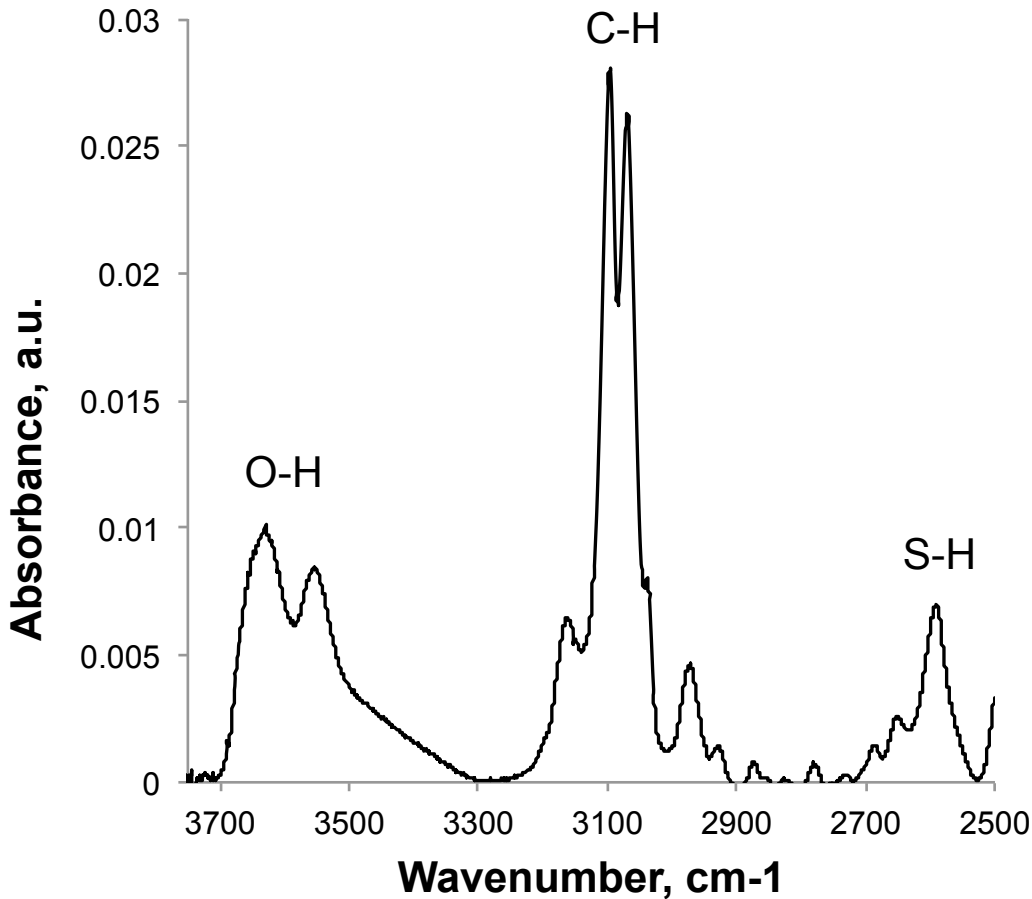

Supplement: rsif20160837supp1.pdf [file rsif20160837supp1.pdf]
